# Supplementary material
Source: PubMed Central journal article supplement (PMC3982767)
Supplement: supp_pp.113.233551_233551_revSupportingInformation_rearranged.pdf [file supp_pp.113.233551_233551_revSupportingInformation_rearranged.pdf]

## Contents

**Supplemental Figure S1.** Root Growth comparison between *Arabidopsis thaliana* (At), *Schrenkiella parvula* (Sp) and *Eutrema salsugineum* (Es)

**Supplemental Figure S2.** Comparison of root growth of *A. thaliana* (At) and *S. parvula* (Sp) under different concentrations of salts and metal ions

**Supplemental Figure S3.** Comparison of ion contents between *S. parvula* (Sp) and *A. thaliana* (At)

**Supplemental Figure S4.** Flowchart depicting the process of homologous gene pair identification, RNA-seq and downstream bioinformatics analyses.

**Supplemental Figure S5.** Comparison of genomic regions near *NHX8* loci of *Arabidopsis lyrata* (Al), *S. parvula* (Sp) and *E. salsugineum* (Es), using CoGE GEvo

**Supplemental Figure S6.** Quantitative RT-PCR analysis of transcript abundance of *NHX8* homologs in *S. parvula* (Sp)

**Supplemental Figure S7.** Comparison of co-linear genomic regions near *AVP1;2* loci, of *A. lyrata* (Al), *S. parvula* (Sp) and *E. salsugineum* (Es)

**Supplemental Figure S8.** Quantitative RT-PCR analysis of transcript abundance of *AVP1* homologs in *S. parvula* (Sp)

**Supplemental Figure S9.** Quantitative RT-PCR comparing relative transcript abundances of *BOR5* homologs between *S. parvula* (Sp) and *A. thaliana* (At)

**Supplemental Table S1.** Summary of networks of GO terms over-represented in DEGP groups SpR and AtR

**Supplemental Table S2.** Summary of networks of GO terms over-represented in DEGP groups SpS and AtS

**Supplemental Table S3.** List of salt or ion stress-related *A. thaliana* (At) qualitative trait loci that are either included in DEGPs or showing CNVs in *S. parvula* (Sp)

**Supplemental Table S4.** Overview of ion transporter gene families in *S. parvula* (Sp) and *A. thaliana* (At)

**Supplemental Table S5.** List of DEGPs encoding ion transporters and channels

**Supplemental Table S6.** Detailed information of homologous gene pairs shown in Figure 4

**Supplemental Table S7.** Detailed information of homologous gene pairs shown in Figure 5

**References used in the supporting information**

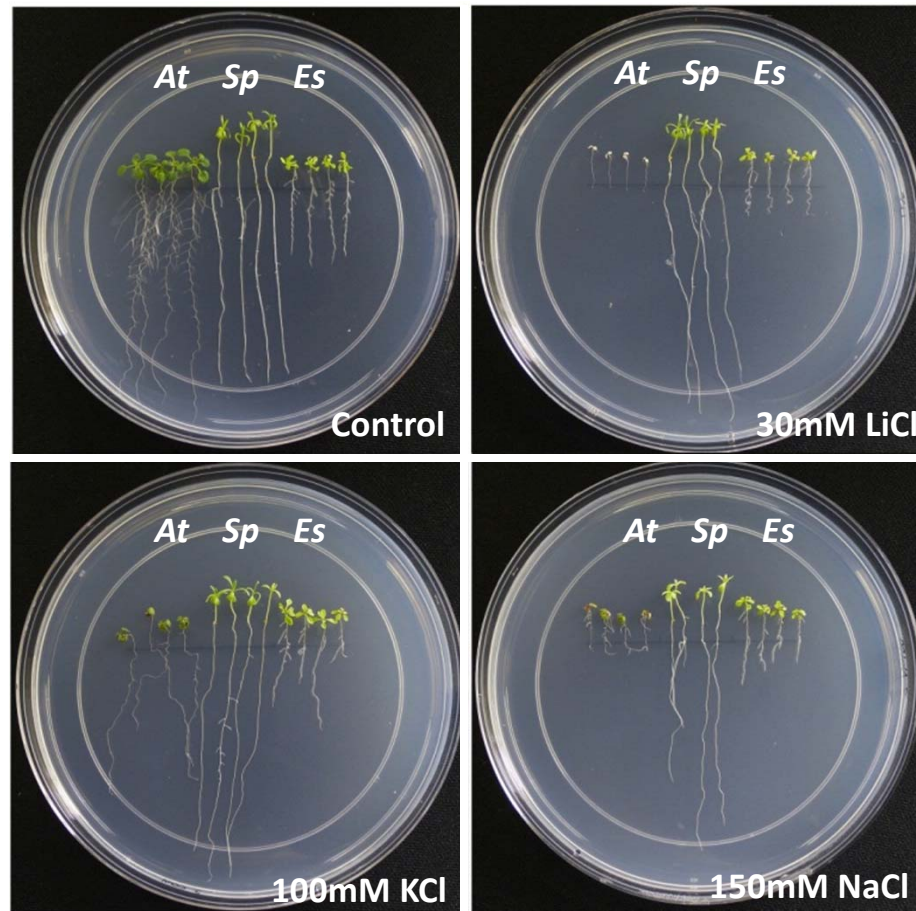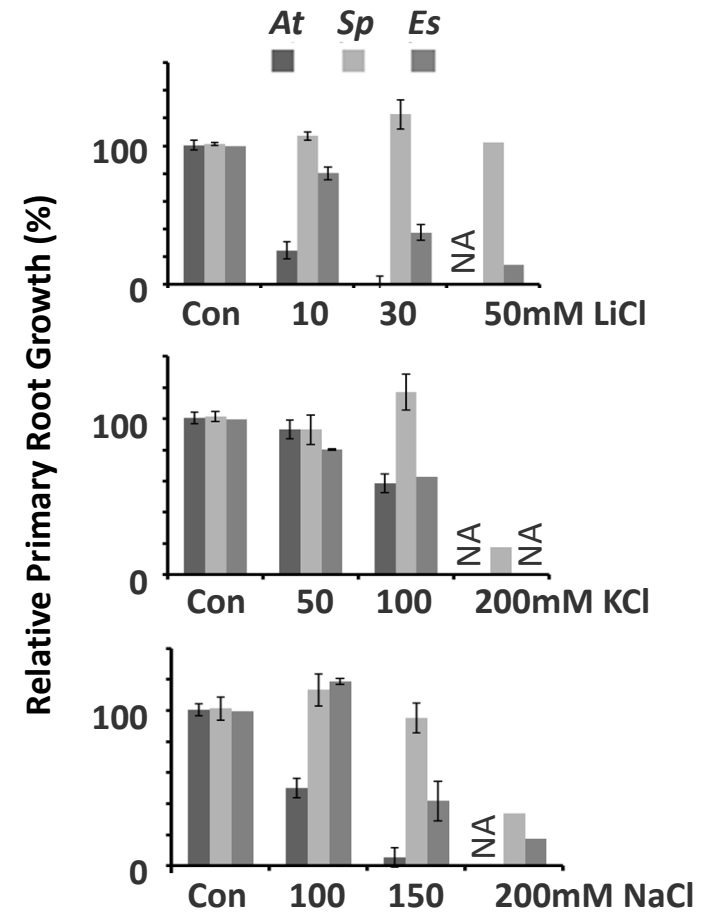

**Supplemental Figure S1.** Root growth comparison between *Arabidopsis thaliana* (At), *Schrenkiella parvula* (Sp) and *Eutrema salsaugineum* (Es). Plant growth, treatments and measurements were done the same as for Figure 1B and 1C.

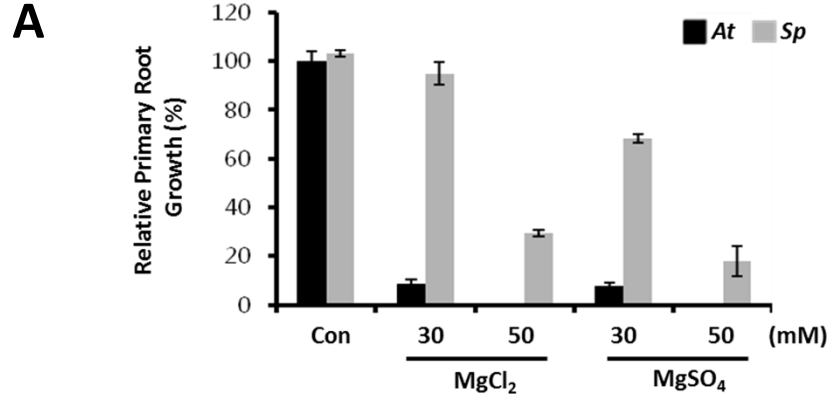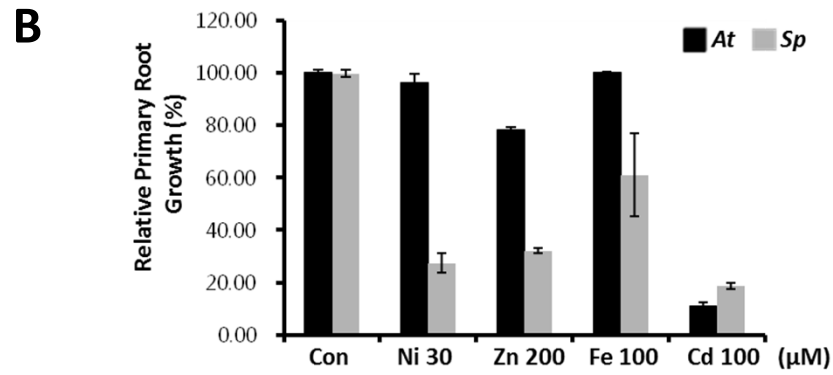

**Supplemental Figure S2.** Comparison of root growth of *A. thaliana* (At) and *S. parvula* (Sp) under different concentrations of salts and metal ions. Plant growth, treatments and measurements were performed the same as for Figure 1B and 1C, with supplement of indicated concentrations of salts and metal ions.

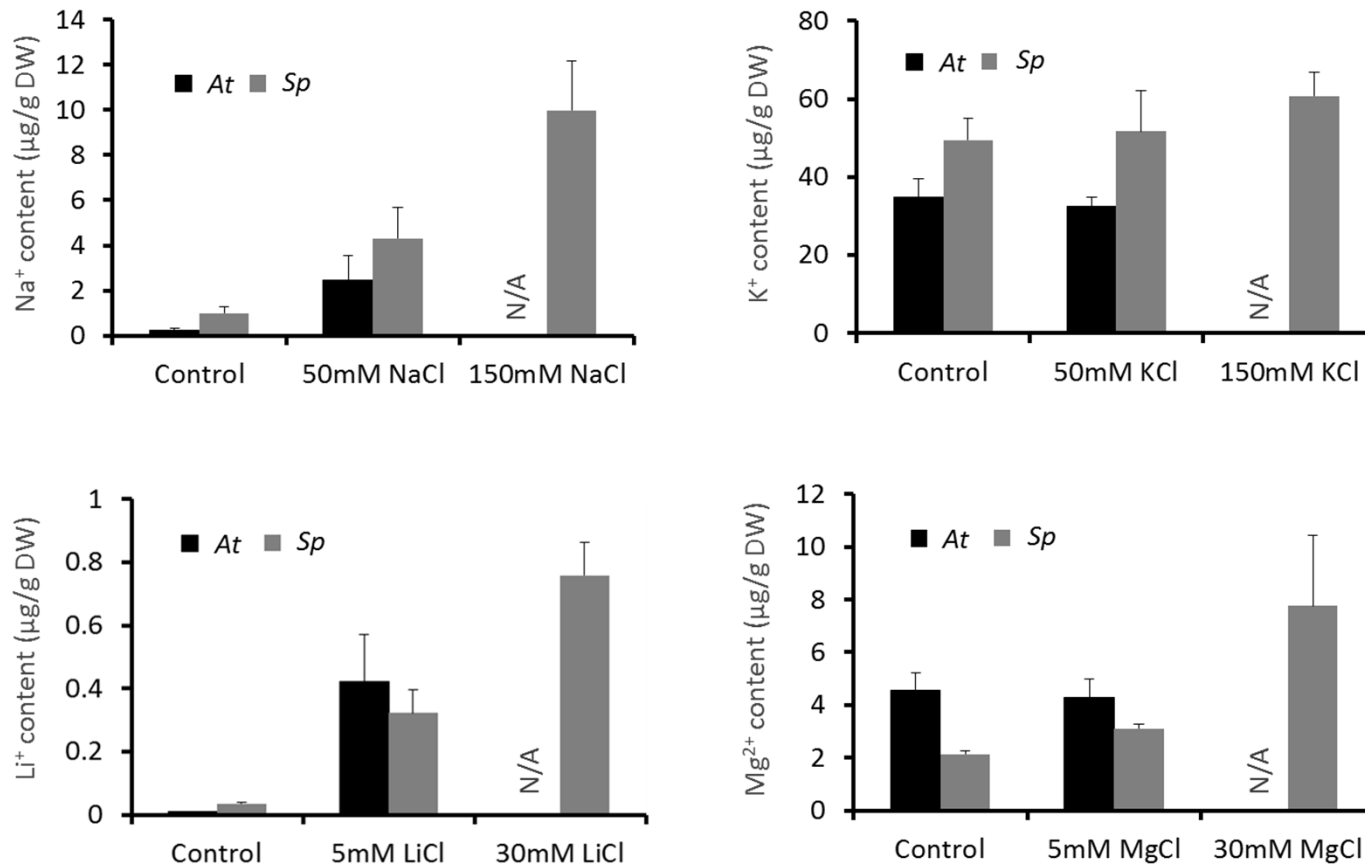

**Supplemental Figure S3.** Comparison of ion contents between *S. parvula* (Sp) and *A. thaliana* (At)

Plant growth and treatment were done essentially the same as Figure 1A, on root wash mix soil (see Methods) with addition of indicated concentrations of salts to the irrigation. After 2 weeks of salt treatment, 10 leaves of comparable developmental stages were harvested from individual plant, dried and digested in 0.6mL concentrated nitric acid (ultrapure grade, Mallinckrodt, St Louis, MO). Samples were diluted to 6mL, from which 1.2mL were used for analysis with Elan DRC-e ICP-MS (Inductively Coupled Plasma-Mass Spectrometry, PerkinElmer, Waltham, MA). Indium was used as internal standard. Error bars indicate standard deviations from 4 biological repeats.

4 week-old *At* and *Sp* plants , shoot and root, 3 biological repeats  
→ RNA-seq generated ~51million 100nt reads per sample

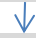

RNA-seq reads aligned to genome and gene models by RUM<sup>b</sup>  
→ ~ 96.0% (*At*) and ~93.4% (*Sp*) of reads uniquely mapped  
→ RPKM values calculated for all *At* and *Sp* gene models

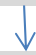

Homologous gene pairs with different expression strength  
(DEGPs) between the two species are identified by DESeq<sup>c</sup>

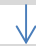

Identification of over-represented Gene Ontology (GO) terms  
and gene families with PlantGSEA<sup>d</sup>

Identification of *Sp* - *At* homologous gene pairs  
→ Clustering homologous genes with OrthoMCL<sup>a</sup>  
→ Reciprocal BlastN identifies pairs with best hit  
scores within each homologous gene cluster1

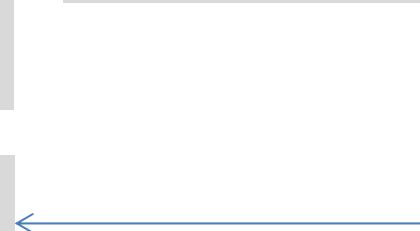

<sup>a</sup> Li et al (2003) <sup>b</sup> Grant et al (2011) <sup>c</sup> Anders and Huber (2010) <sup>d</sup> Yi et al (2013)

**Supplemental Figure S4.** Flowchart depicting the process of homologous gene pair identification, RNA-seq and downstream bioinformatics analyses.

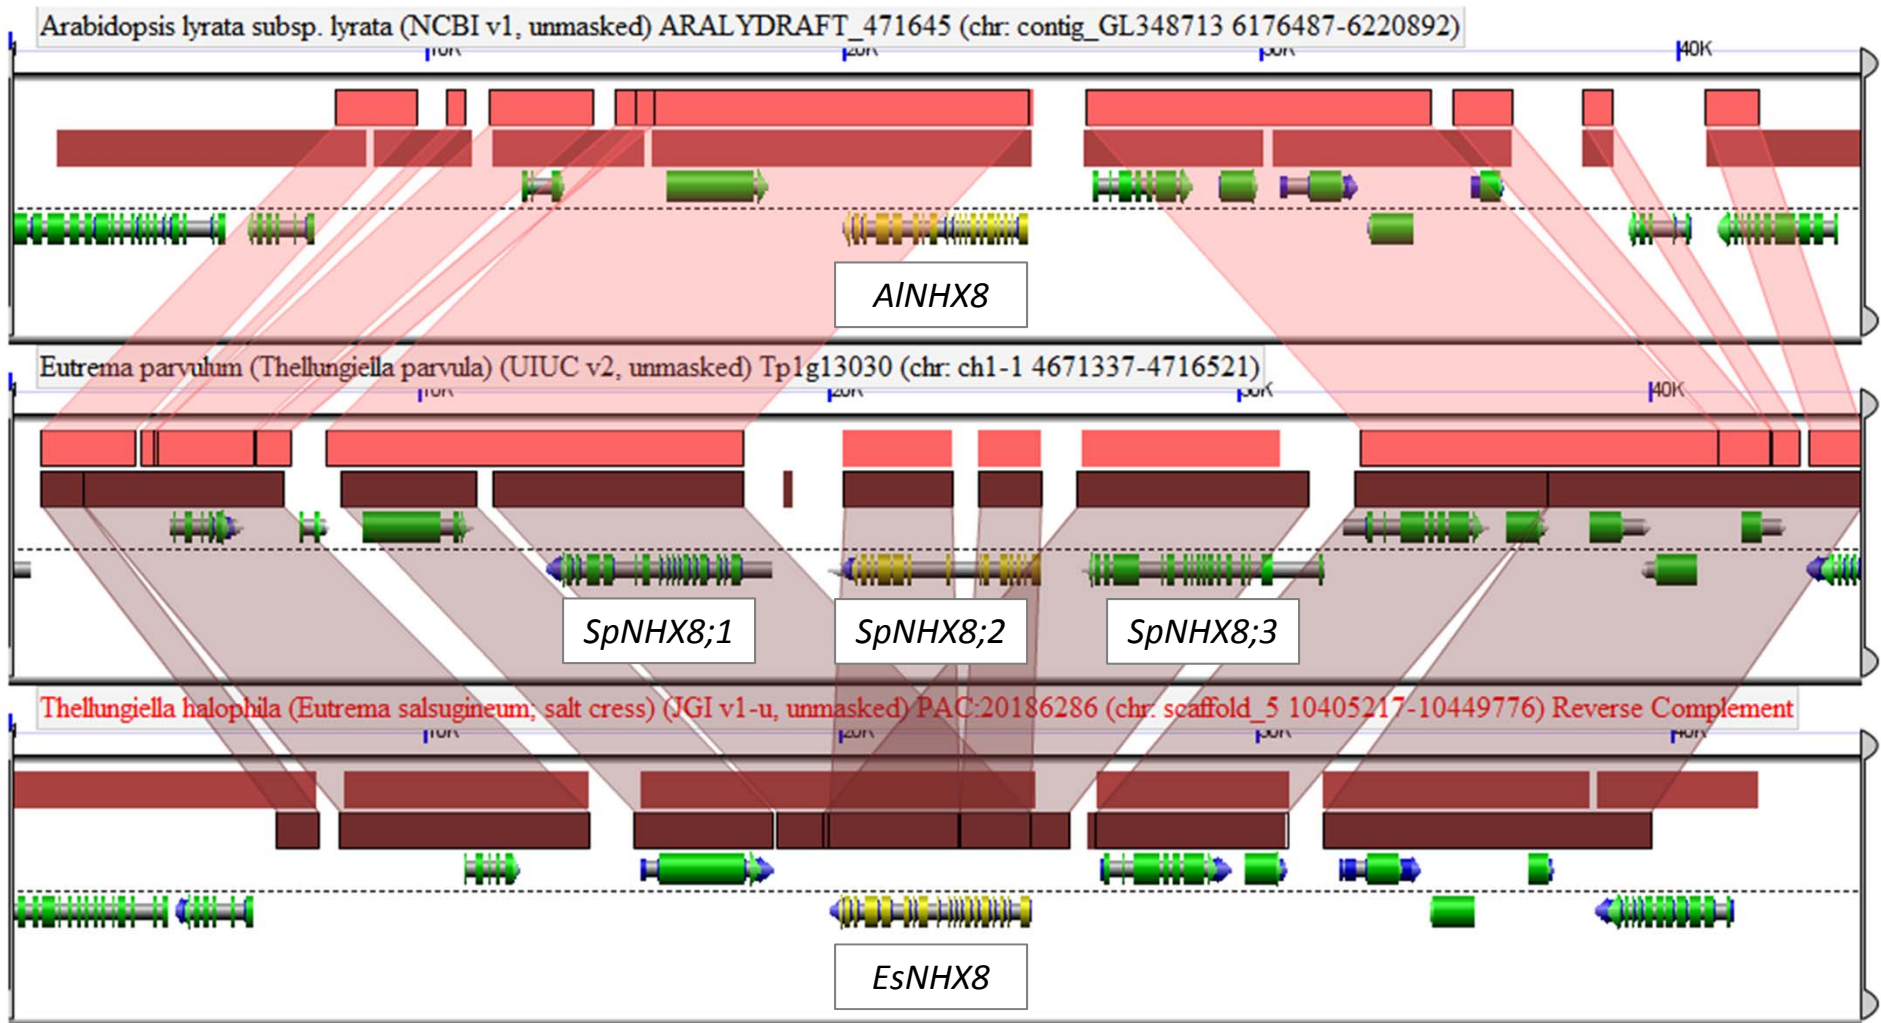

**Supplemental Figure S5.** Comparison of genomic regions near *NHX8* loci of *Arabidopsis lyrata* (Al), *S. parvula* (Sp) and *E. salsugineum* (Es). The pink and brown boxes indicate genomic regions showing sequence similarity, identified by LASTZ algorithm implemented in the CoGE GEvo (Lyon and Freeling, 2008). Gene models encoding *NHX8* homologs were indicated with boxed gene IDs. The comparison and all settings are available through a permanent link provided by CoGE at: <http://genomeevolution.org/r/9tfh>. Note that the duplication at the *NHX8* locus is found only in the lithium-tolerant *S. parvula*. The same genomic region of *A. thaliana* was presented in Figure 4B of the main text, in comparison with *S. parvula*. *E. salsugineum* genome is from Yang et al. (2013).

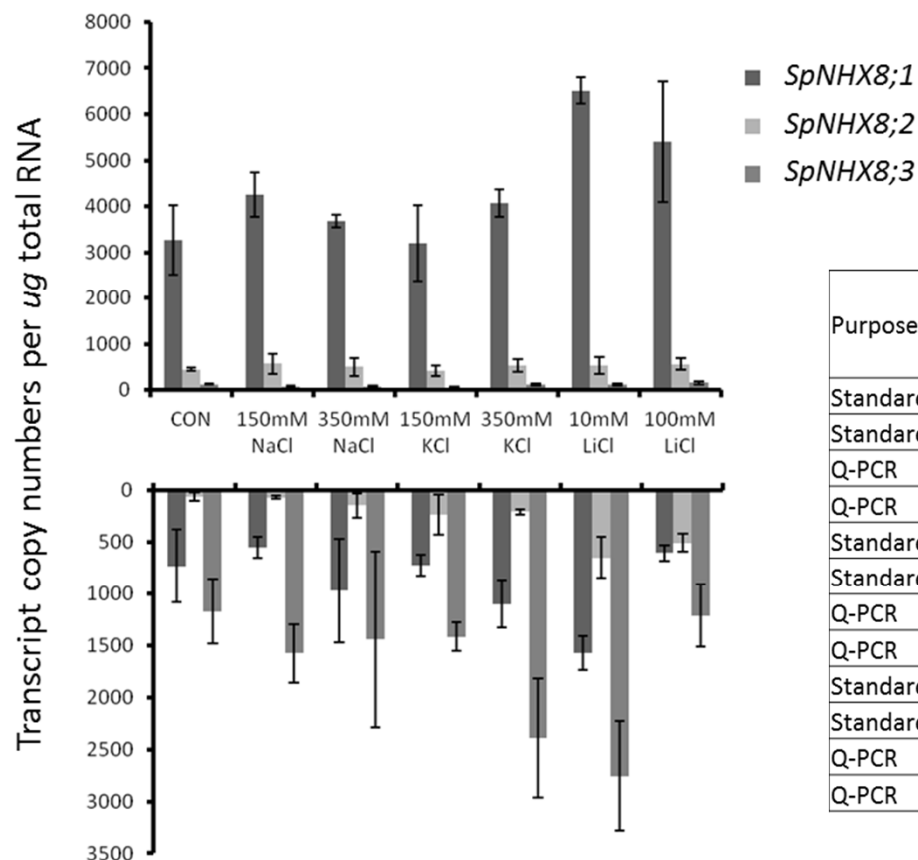

| Purpose  | Gene ID   | Annotation      | Direction | Starting position in the gene | Primer sequence              |
|----------|-----------|-----------------|-----------|-------------------------------|------------------------------|
| Standard | Sp1g13020 | <i>SpNHX8;1</i> | Forward   | 628                           | GGTTCAGATCAGTGTAACGCTGTCC    |
| Standard | Sp1g13020 | <i>SpNHX8;1</i> | Reverse   | 1177                          | ACGAATTTCCAATTGATTGTTTTACAG  |
| Q-PCR    | Sp1g13020 | <i>SpNHX8;1</i> | Forward   | 928                           | GGCGATCTTAGCAGTCAGATATCTCAC  |
| Q-PCR    | Sp1g13020 | <i>SpNHX8;1</i> | Reverse   | 1056                          | GCCAAAACGACGTAGCAATGGGTAC    |
| Standard | Sp1g13030 | <i>SpNHX8;2</i> | Forward   | 19                            | TCGACGTTGCCGTACAGATCATTG     |
| Standard | Sp1g13030 | <i>SpNHX8;2</i> | Reverse   | 509                           | GCCACAGGATCGGTAGCACCTAAAA    |
| Q-PCR    | Sp1g13030 | <i>SpNHX8;2</i> | Forward   | 382                           | GCTGGCCCTGGAGTTTTAATCTCTACC  |
| Q-PCR    | Sp1g13030 | <i>SpNHX8;2</i> | Reverse   | 453                           | CCAGTCATATGGAAAAGTGAATTCAGA  |
| Standard | Sp1g13040 | <i>SpNHX8;3</i> | Forward   | 116                           | AAAAGTCCGGTGAAGAGTGCTTTTC    |
| Standard | Sp1g13040 | <i>SpNHX8;3</i> | Reverse   | 582                           | CAATGATGTTTTCCAATCCCAGTTATAT |
| Q-PCR    | Sp1g13040 | <i>SpNHX8;3</i> | Forward   | 152                           | TTGTTGTCCATCCATAATAAAAAGGAG  |
| Q-PCR    | Sp1g13040 | <i>SpNHX8;3</i> | Reverse   | 262                           | CGCTCTCCATTGAAAACGAAGAAGAA   |

**Supplemental Figure S6.** Quantitative RT-PCR analysis of transcript abundances of *NHX8* homologs in *S. parvula* (Sp)

Four-week old *S. parvula* plants, grown in the same manner as the Figure 2 in the main text, were treated with indicated concentration of different salts for 24 hours. RNA samples were prepared as described in Methods for preparation of RNA-seq samples. Reverse transcription was performed with 0.7µg of total RNAs using SuperScriptIII (Life Technology, Carlsbad, CA), to produce cDNA samples. The transcript copy numbers were determined using primers specific to each *SpNHX8* duplicates, as shown in the table. PCR fragments of about 500 nucleotides encompassing the amplicons used for quantitative real-time PCR (Q-PCR) were amplified from cDNA samples and cloned into pGemT-easy vector (Promega, Madison, WI). Q-PCR was performed on cDNA samples, as well as on serial dilutions of known amounts of the cloned PCR fragments as standards for copy numbers. Transcript copy numbers were deduced based on comparison of Q-PCR results between cDNA samples and standards. Error bars indicate standard deviation from three biological repeats.



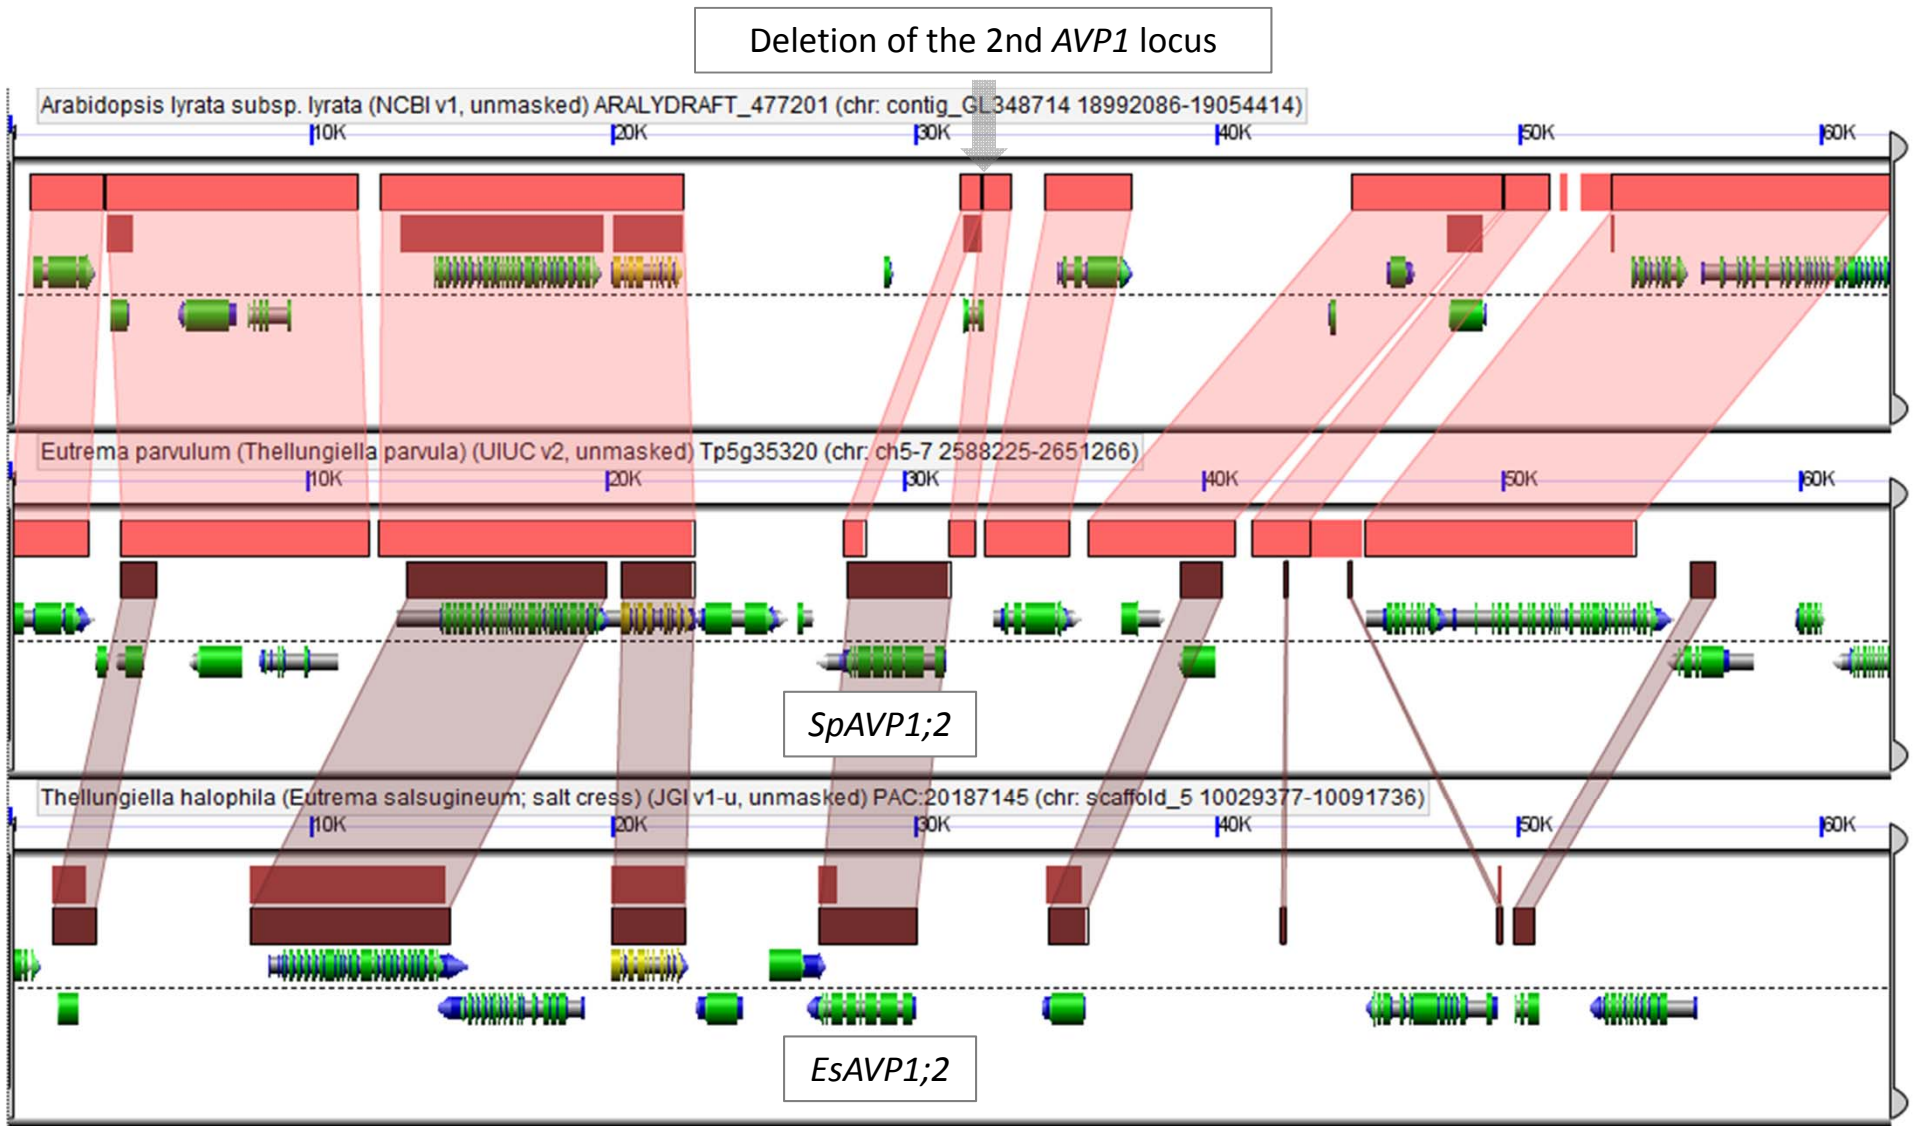

**Supplemental Figure S7.** Comparison of co-linear genomic regions near *AVP1;2* loci of *A. lyrata* (Al), *S. parvula* (Sp) and *E. salsugineum* (Es). The figure was generated in the same method as Figure S5, showing gene models encoding *AVP1;2* homologs with boxed gene IDs for Sp and Es, and deletion of the gene in Al. The comparison and all settings are available at: <http://genomeevolution.org/r/9tfs>. Note that both halophytic species, Es and Sp, have kept the second *AVP1* copies, while both Arabidopsis species have deletions at the same loci. The same genomic region of *A. thaliana* was presented in Figure 5A of the main text, in comparison with *S. parvula*. *E. salsugineum* genome is from Yang et al. (2013).



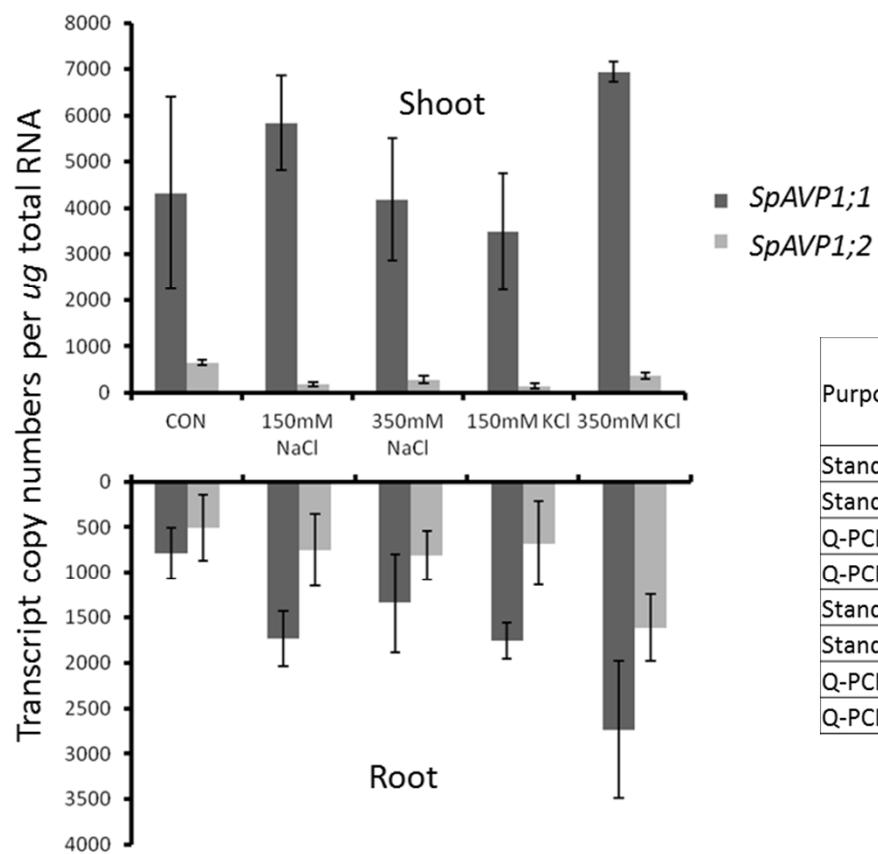

| Purpose  | Gene ID   | Annotation      | Direction | Starting position in the gene | Primer sequence            |
|----------|-----------|-----------------|-----------|-------------------------------|----------------------------|
| Standard | Sp5g35350 | <i>SpAVP1;1</i> | Forward   | 209                           | GTGGCGCGTCTTCTCTTCTCAAG    |
| Standard | Sp5g35350 | <i>SpAVP1;1</i> | Reverse   | 701                           | AGCACCAAGAGACCGTTTGCAGC    |
| Q-PCR    | Sp5g35350 | <i>SpAVP1;1</i> | Forward   | 209                           | GTGGCGCGTCTTCTCTTCTCAAG    |
| Q-PCR    | Sp5g35350 | <i>SpAVP1;1</i> | Reverse   | 348                           | AGAAGTTGCACCTTCGGATATAGCG  |
| Standard | Sp1g13990 | <i>SpAVP1;2</i> | Forward   | 235                           | AAGGTGCATCGTCTCCGGTGGT     |
| Standard | Sp1g13990 | <i>SpAVP1;2</i> | Reverse   | 743                           | GGTAATGTAGAGCACCAACAGACCAC |
| Q-PCR    | Sp1g13990 | <i>SpAVP1;2</i> | Forward   | 235                           | AAGGTGCATCGTCTCCGGTGGT     |
| Q-PCR    | Sp1g13990 | <i>SpAVP1;2</i> | Reverse   | 381                           | ATGAAGTTGCACCTTCGGATATAGCA |

**Supplemental Figure S8.** Quantitative RT-PCR analysis of transcript abundances of *AVP1* homologs in *S. parvula* (Sp)

See the legend of Figure S6 for experimental procedures and explanations.

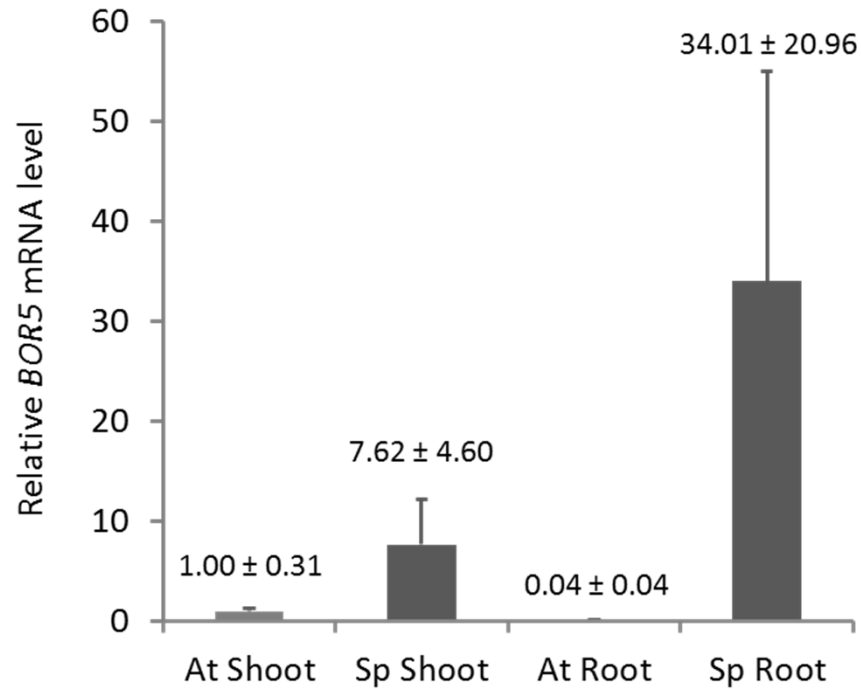

| Purpose | Gene ID             | Annotation          | Direction | Starting position in the gene* | Primer sequence         |
|---------|---------------------|---------------------|-----------|--------------------------------|-------------------------|
| Q-PCR   | Sp5g29940-At1g74810 | <i>BOR5</i> (set 1) | Forward   | 1827                           | GGAGATCCCTGGAACCTCTAGA  |
| Q-PCR   | Sp5g29940-At1g74810 | <i>BOR5</i> (set 1) | Reverse   | 1951                           | TGAGCTCGCCTCTGCTCGT     |
| Q-PCR   | Sp5g29940-At1g74810 | <i>BOR5</i> (set 2) | Forward   | 1351                           | GGTTTCGATCCAGAGAAGCA    |
| Q-PCR   | Sp5g29940-At1g74810 | <i>BOR5</i> (set 2) | Reverse   | 1427                           | TGCAACAGGTTGCTCACTCTCT  |
| Q-PCR   | Sp3g16870-At3g18780 | <i>ACT2</i>         | Forward   | 1224                           | GCAGCATGAAGATTAAGGTCGTT |
| Q-PCR   | Sp3g16870-At3g18780 | <i>ACT2</i>         | Reverse   | 1330                           | GGAGATCCACATCTGCTGGAAT  |

\*Positions in the At homologs. All primer sequences are conserved in the homologs of both species

**Supplemental Figure S9.** Quantitative RT-PCR comparing relative transcript abundances of *BOR5* homologs between *S. parvula* (Sp) and *A. thaliana* (At)

Relative expression levels are normalized with *ACT2* as the control and shown in a scale with the At Shoot data point as 1. All primers were designed to match both At and Sp sequences with the same amplicon length between species. Standard deviation is from four RT-PCR runs using two biological replicates and two different sets of *BOR5* primers.

**Supplemental Table S1. Summary of networks of GO terms over-represented in DEGP groups SpR and AtR**

| Group                                                   | Network <sup>a</sup>                             | GO term <sup>b</sup>                                                                                    | Number (%) in DEGP group                   | Number (%) in background <sup>c</sup> | log(FDR)        | Representative gene family |  |
|---------------------------------------------------------|--------------------------------------------------|---------------------------------------------------------------------------------------------------------|--------------------------------------------|---------------------------------------|-----------------|----------------------------|--|
| SpR<br>(n=945)                                          | 1F                                               | transporter activity                                                                                    | 75 (7.9%)                                  | 1292 (4.6%)                           | -5.1            |                            |  |
|                                                         |                                                  | └ active transmembrane transporter activity                                                             | 43 (4.6%)                                  | 597 (2.1%)                            | -5.4            |                            |  |
|                                                         |                                                  | └└ antiporter activity                                                                                  | 16 (1.7%)                                  | 145 (0.5%)                            | -4.5            |                            |  |
|                                                         |                                                  | └└└ monovalent cation:hydrogen antiporter activity                                                      | 7 (0.7%)                                   | 45 (0.2%)                             | -3.2            |                            |  |
|                                                         |                                                  | └ substrate-specific transmembrane transporter activity                                                 | 51 (5.4%)                                  | 820 (2.9%)                            | -4.5            |                            |  |
|                                                         |                                                  |                                                                                                         | └ amine transmembrane transporter activity | 11 (1.2%)                             | 77 (0.3%)       | -4.3                       |  |
|                                                         | 2P                                               | secondary metabolic process                                                                             | 70 (7.4%)                                  | 1242 (4.4%)                           | -4.5            |                            |  |
|                                                         |                                                  | └ isoprenoid metabolic process                                                                          | 37 (3.9%)                                  | 501 (1.8%)                            | -5.0            |                            |  |
|                                                         |                                                  | └ pigment metabolic process                                                                             | 32 (3.4%)                                  | 359 (1.3%)                            | -6.1            |                            |  |
|                                                         |                                                  | └└ carotenoid metabolic process                                                                         | 13 (1.4%)                                  | 111 (0.4%)                            | -4.0            |                            |  |
|                                                         |                                                  | └└ anthocyanin biosynthetic process                                                                     | 10 (1.1%)                                  | 63 (0.2%)                             | -4.3            |                            |  |
|                                                         | 3F                                               | catalytic activity                                                                                      | 392 (41.5%)                                | 8760 (30.9%)                          | -6.2            |                            |  |
|                                                         |                                                  | └ esterase activity                                                                                     | 55 (5.8%)                                  | 1040 (3.7%)                           | -3.1            |                            |  |
|                                                         |                                                  | └ oxidoreductase activity, acting on CH-OH group of donors                                              | 19 (2.0%)                                  | 217 (0.8%)                            | -3.8            |                            |  |
| └ acyltransferase activity                              |                                                  | 23 (2.4%)                                                                                               | 298 (1.1%)                                 | -3.7                                  |                 |                            |  |
| 4F                                                      | enzyme inhibitor activity                        | 16 (1.7%)                                                                                               | 188 (0.7%)                                 | -3.2                                  |                 |                            |  |
| AtR<br>(n=972)                                          | 1P                                               | transport                                                                                               | 180 (18.5%)                                | 3566 (12.6%)                          | -5.7            |                            |  |
|                                                         |                                                  | └ cation transport                                                                                      | 53 (5.5%)                                  | 813 (2.9%)                            | -4.9            |                            |  |
|                                                         |                                                  | └└ metal ion transport                                                                                  | 50 (5.1%)                                  | 576 (2.0%)                            | -8.2            |                            |  |
|                                                         |                                                  | └ inorganic anion transport                                                                             | 27 (2.8%)                                  | 267 (0.9%)                            | -6.1            |                            |  |
|                                                         |                                                  | └└ nitrate transport                                                                                    | 24 (2.5%)                                  | 207 (0.7%)                            | -6.5            |                            |  |
|                                                         | 2P                                               | response to stimulus                                                                                    | 299 (30.8%)                                | 6237 (22.0%)                          | -6.5            |                            |  |
|                                                         |                                                  | └ defense response                                                                                      | 98 (10.1%)                                 | 1628 (5.7%)                           | -6.5            |                            |  |
|                                                         |                                                  | └└ innate immune response                                                                               | 53 (5.5%)                                  | 914 (3.2%)                            | -3.6            |                            |  |
|                                                         |                                                  | └ response to inorganic substance                                                                       | 68 (7.0%)                                  | 1078 (3.8%)                           | -5.5            |                            |  |
|                                                         |                                                  | └└ response to nitrate                                                                                  | 26 (2.7%)                                  | 199 (0.7%)                            | -8.1            |                            |  |
|                                                         | 3F                                               | catalytic activity                                                                                      | 415 (42.7%)                                | 8760 (30.9%)                          | -7.7            |                            |  |
|                                                         |                                                  | └ glycosyltransferase activity                                                                          | 40 (4.1%)                                  | 590 (2.1%)                            | -4.2            | Glycosyltransferase        |  |
|                                                         |                                                  | └ oxidoreductase activity, acting on paired donors, with incorporation or reduction of molecular oxygen | 45 (4.6%)                                  | 463 (1.6%)                            | -9.0            |                            |  |
|                                                         | 4F                                               | transporter activity                                                                                    | 76 (7.8%)                                  | 1292 (4.6%)                           | -5.0            |                            |  |
| └ substrate-specific transmembrane transporter activity |                                                  | 47 (4.8%)                                                                                               | 820 (2.9%)                                 | -3.2                                  |                 |                            |  |
| └└ amine transmembrane transporter activity             |                                                  | 9 (0.9%)                                                                                                | 77 (0.3%)                                  | -2.9                                  |                 |                            |  |
| 5P                                                      | secondary metabolic process                      | 72 (7.4%)                                                                                               | 1242 (4.4%)                                | -4.6                                  |                 |                            |  |
|                                                         | cellular amino acid derivative metabolic process | 44 (4.5%)                                                                                               | 703 (2.5%)                                 | -3.8                                  |                 |                            |  |
|                                                         | └ phenylpropanoid metabolic process              | 30 (3.1%)                                                                                               | 396 (1.4%)                                 | -4.2                                  |                 |                            |  |
| 6F                                                      | purine nucleoside binding                        | 112 (11.5%)                                                                                             | 2378 (8.4%)                                | -3.0                                  |                 |                            |  |
|                                                         | └ ADP binding                                    | 18 (1.9%)                                                                                               | 168 (0.6%)                                 | -4.6                                  | TIR-NBS-LRR     |                            |  |
| 7F                                                      | heme binding                                     | 41 (4.2%)                                                                                               | 377 (1.3%)                                 | -9.7                                  | Cytochrome P450 |                            |  |

<sup>a</sup> P=Biological Process, F=Molecular Function; <sup>b</sup> GO terms best describing all branches of the network are selected ; <sup>c</sup> GO annotation of *A. thaliana* (TAIR10, n= 28,352) was used as the background.

**Supplemental Table S2.** Summary of networks of GO terms over-represented in DEGP groups SpS and AtS

| Group                             | Network <sup>a</sup>                       | GO term <sup>b</sup>                             | Number (%) in DEGP group | Number (%) in background <sup>c</sup> | log(FDR)           | Representative gene family |
|-----------------------------------|--------------------------------------------|--------------------------------------------------|--------------------------|---------------------------------------|--------------------|----------------------------|
| SpS<br>(n=965)                    | 1P                                         | cell wall organization or biogenesis             | 61 (6.3%)                | 946 (3.3%)                            | -5.4               |                            |
|                                   |                                            | └ cell wall polysaccharide metabolic process     | 29 (3.0%)                | 227 (0.8%)                            | -8.8               |                            |
|                                   |                                            | └ xylan biosynthetic process                     | 24 (2.5%)                | 182 (0.6%)                            | -7.7               |                            |
|                                   | 2P                                         | pollen tube development                          | 24 (2.5%)                | 287 (1.0%)                            | -4.2               |                            |
|                                   |                                            | └ cell tip growth                                | 25 (2.6%)                | 328 (1.2%)                            | -3.7               |                            |
|                                   | 3P                                         | actin filament-based process                     | 23 (2.4%)                | 260 (0.9%)                            | -4.4               |                            |
|                                   |                                            | └ cytoskeleton-dependent intracellular transport | 12 (1.2%)                | 82 (0.3%)                             | -4.6               |                            |
|                                   |                                            | └ xylem development                              | 13 (1.3%)                | 82 (0.3%)                             | -5.4               |                            |
|                                   | AtS<br>(n=1,058)                           | 1P                                               | response to stimulus     | 341 (32.2%)                           | 6237 (22.0%)       | -9.1                       |
| └ defense response                |                                            |                                                  | 127 (12.0%)              | 1628 (5.7%)                           | -12.8              |                            |
| └└ innate immune response         |                                            |                                                  | 68 (6.4%)                | 914 (3.2%)                            | -6.7               |                            |
| └ cell death                      |                                            |                                                  | 35 (3.3%)                | 495 (1.7%)                            | -3.5               |                            |
| └ response to inorganic substance |                                            |                                                  | 85 (8.0%)                | 1078 (3.8%)                           | -9.3               |                            |
| └└ response to nitrate            |                                            |                                                  | 34 (3.2%)                | 199 (0.7%)                            | -12.6              |                            |
| └└ response to metal ion          |                                            |                                                  | 40 (3.8%)                | 608 (2.1%)                            | -3.2               |                            |
| 2P                                |                                            | secondary metabolic process                      | 73 (6.9%)                | 1242 (4.4%)                           | -3.7               |                            |
|                                   |                                            | cellular aromatic compound metabolic process     | 66 (6.2%)                | 1015 (3.6%)                           | -4.7               |                            |
|                                   |                                            | └ phenylpropanoid metabolic process              | 30 (2.8%)                | 396 (1.4%)                            | -3.6               |                            |
|                                   |                                            | └ auxin biosynthetic process                     | 15 (1.4%)                | 123 (0.4%)                            | -4.2               |                            |
| 3P                                |                                            | transport                                        | 191 (18.1%)              | 3566 (12.6%)                          | -5.4               |                            |
|                                   |                                            | └ amino acid transport                           | 23 (2.2%)                | 266 (0.9%)                            | -3.7               |                            |
|                                   |                                            | └ metal ion transport                            | 54 (5.1%)                | 576 (2.0%)                            | -8.7               |                            |
|                                   |                                            | └ nitrate transport                              | 35 (3.3%)                | 207 (0.7%)                            | -12.9              |                            |
| 4P                                |                                            | regulation of biological quality                 | 91 (8.6%)                | 1609 (5.7%)                           | -3.9               |                            |
|                                   |                                            | └ ion homeostasis                                | 25 (2.4%)                | 227 (0.8%)                            | -5.7               |                            |
| 5F                                |                                            | └└ metal ion homeostasis                         | 9 (0.9%)                 | 51 (0.2%)                             | -4.0               |                            |
|                                   |                                            | nucleotide binding                               | 176 (16.6%)              | 3504 (12.4%)                          | -3.7               |                            |
| 6F                                |                                            | └ ADP binding                                    | 38 (3.6%)                | 168 (0.6%)                            | -18.3              | TIR-NBS-LRR                |
|                                   |                                            | catalytic activity                               | 441 (41.7%)              | 8760 (30.9%)                          | -7.1               |                            |
| 7P                                | └ glycosyltransferase                      | 40 (3.8%)                                        | 590 (2.1%)               | -3.5                                  |                    |                            |
|                                   | regulation of defense response             | 41 (3.9%)                                        | 524 (1.8%)               | -4.9                                  |                    |                            |
|                                   | └ regulation of innate immune response     | 30 (2.8%)                                        | 412 (1.5%)               | -3.3                                  |                    |                            |
| 8F                                | └└ negative regulation of defense response | 24 (2.3%)                                        | 274 (1.0%)               | -3.9                                  |                    |                            |
|                                   | heme binding                               | 36 (3.4%)                                        | 377 (1.3%)               | -6.3                                  | Cytochrome P450    |                            |
| 9F                                | ligand-gated channel activity              | 6 (0.6%)                                         | 29 (0.1%)                | -3.2                                  | Glutamate receptor |                            |

<sup>a</sup> P=Biological Process, F=Molecular Function; <sup>b</sup> GO terms best describing all branches of the network are selected ; <sup>c</sup> GO annotation of *A. thaliana* (TAIR10, n= 28,352) was used as the background.

**Supplemental Table S3.** List of salt or ion stress-related *A. thaliana* (*At*) qualitative trait loci<sup>a</sup> that are either included in DEGPs or showing CNVs in *S. parvula* (*Sp*)

| Keyword      | At Locus  | Name                                               | Function                   | DEGP group | Copy number in <i>Sp</i> | Reference             |
|--------------|-----------|----------------------------------------------------|----------------------------|------------|--------------------------|-----------------------|
|              | At2g36270 | ABA Insensitive 5 (ABI5)                           | Transcription factor       | SpR        | 1                        | TAIR germplasm DB     |
|              | At1g15690 | Arabidopsis Vacuolar Pyrophosphatase1 (AVP1)       | Ion transport              | -          | 2                        | Pasapula et al., 2011 |
| Salt stress, | At4g33000 | Calcineurin B-Like 10 (CBL10)                      | Ca <sup>2+</sup> signaling | -          | 3                        | TAIR germplasm DB     |
| Sodium,      | At2g39800 | delta1-Pyrroline-5-Carboxylate Synthase 1 (P5CS1)  | Proline synthesis          | SpR        | 1                        | TAIR germplasm DB     |
| Potassium    | At4g10310 | High-affinity K <sup>+</sup> Transporter 1 (HKT1)  | Ion transport              | SpS,AtR    | 2                        | TAIR germplasm DB     |
|              | At2g36490 | Repressor of Silencing 1 (ROS1)                    | DNA demethylation          | SpR        | 1                        | TAIR germplasm DB     |
|              | At2g01980 | Salt Overly Sensitive 1 (SOS1)                     | Ion transport              | SpR,SpS    | 1                        | TAIR germplasm DB     |
| Lithium      | At1g14660 | Na <sup>+</sup> /H <sup>+</sup> Exchanger 8 (NHX8) | Ion transport              | SpR,SpS    | 3                        | An et al., 2007       |
| Magnesium    | At5g09690 | Magnesium Transporter 7 (MGT7)                     | Ion transport              | AtS        | 1                        | TAIR germplasm DB     |
|              | At4g10380 | NOD26-like Intrinsic Protein 5;1 (NIP5;1)          | Ion transport              | SpS        | 1                        | TAIR germplasm DB     |
| Boron        | At1g80760 | NOD26-like Intrinsic Protein 6;1 (NIP6;1)          | Ion transport              | -          | 2                        | TAIR germplasm DB     |

<sup>a</sup>At loci reported with salt or ion stress-related phenotypes when either mutated or over-expressed, curated by text mining with relevant keywords in TAIR germplasm database (DB) , the latest TAIR gene annotation, and the literature.

**Supplemental Table S4. Overview of ion transporter gene families in *S. parvula* (Sp) and *A. thaliana* (At)**

| Ion transporter gene family <sup>a</sup>                | # Sp <sup>b</sup> | # At | DEGPs /<br>gene pairs (%) | SpR | SpS | AtR | AtS |
|---------------------------------------------------------|-------------------|------|---------------------------|-----|-----|-----|-----|
| Na <sup>+</sup> K <sup>+</sup> transporter (HKT1)       | 2                 | 1    | 2 / 2 (100.0%)            | 0   | 1   | 0   | 1   |
| Other anion transporter (DUR3, TDT, DiT2.2)             | 4                 | 4    | 3 / 4 ( 75.0%)            | 0   | 0   | 2   | 1   |
| K <sup>+</sup> channel (AKT1, KCOs, SKOR, GORK, KT)     | 17                | 16   | 6 / 15 ( 40.0%)           | 3   | 2   | 1   | 2   |
| Sulphate transporter (SULTRs)                           | 13                | 13   | 5 / 13 ( 38.5%)           | 3   | 3   | 1   | 0   |
| Na <sup>+</sup> -H <sup>+</sup> antiporter (NHXs, SOS1) | 12                | 10   | 4 / 12 ( 33.3%)           | 2   | 2   | 0   | 1   |
| Aquaporins (PIPs, TIPs, NIPs)                           | 35                | 38   | 10 / 32 ( 31.3%)          | 5   | 5   | 3   | 0   |
| K <sup>+</sup> -efflux system (KEAs)                    | 6                 | 6    | 2 / 7 ( 28.6%)            | 2   | 0   | 0   | 0   |
| Nitrate transporter (NRTs)                              | 8                 | 8    | 2 / 7 ( 28.6%)            | 0   | 0   | 1   | 2   |
| Metal transporter (NRAMPs, ZIPs, MTPBs)                 | 47                | 38   | 9 / 34 ( 26.5%)           | 3   | 1   | 5   | 4   |
| Anion exchanger (BORs, HCO <sup>3-</sup> transporters)  | 7                 | 7    | 2 / 8 ( 25.0%)            | 1   | 1   | 1   | 0   |
| Cation-H <sup>+</sup> antiporter (CHXs)                 | 27                | 28   | 5 / 29 ( 17.2%)           | 3   | 4   | 1   | 1   |
| Ammonium transporter (AMTs)                             | 5                 | 6    | 1 / 6 ( 16.7%)            | 1   | 0   | 0   | 0   |
| Glutamate receptor (GLRs)                               | 14                | 21   | 3 / 20 ( 15.0%)           | 0   | 0   | 3   | 0   |
| Cyclic nucleotide gated channel (CNGCs)                 | 21                | 20   | 2 / 18 ( 11.1%)           | 2   | 1   | 1   | 0   |
| Mg <sup>2+</sup> -transporter (MGTs, MRSs)              | 10                | 11   | 1 / 9 ( 11.1%)            | 0   | 0   | 0   | 1   |
| P-type pump (ACAs, AHAs, HMAs, ECAs)                    | 50                | 48   | 5 / 47 ( 10.6%)           | 0   | 1   | 3   | 3   |
| Ca <sup>2+</sup> -H <sup>+</sup> antiporter (CAXs)      | 10                | 11   | 1 / 11 ( 9.1%)            | 1   | 1   | 0   | 0   |
| K <sup>+</sup> -transporter (KUPs, TRH1)                | 18                | 13   | 1 / 14 ( 7.1%)            | 1   | 0   | 0   | 0   |
| Phosphate transporter (PHTs)                            | 20                | 18   | 1 / 17 ( 5.9%)            | 0   | 0   | 1   | 0   |
| V-type pump (Vacuolar ATP synthase subunits)            | 28                | 27   | 1 / 29 ( 3.4%)            | 1   | 0   | 0   | 0   |
| Cl <sup>-</sup> channel (CLCs)                          | 11                | 11   | 0 / 10 ( 0.0%)            | 0   | 0   | 0   | 0   |
| Putative Ca <sup>2+</sup> channel (SCAMPs, TPC1)        | 6                 | 7    | 0 / 6 ( 0.0%)             | 0   | 0   | 0   | 0   |
| F-type ATPase                                           | 5                 | 5    | 0 / 4 ( 0.0%)             | 0   | 0   | 0   | 0   |
| PPase (AVPs)                                            | 3                 | 3    | 0 / 4 ( 0.0%)             | 0   | 0   | 0   | 0   |
| Cation-Cl <sup>-</sup> co-transporter (CCC)             | 1                 | 1    | 0 / 1 ( 0.0%)             | 0   | 0   | 0   | 0   |
| Mg <sup>2+</sup> -H <sup>+</sup> exchanger (MHX)        | 1                 | 1    | 0 / 1 ( 0.0%)             | 0   | 0   | 0   | 0   |
| Total                                                   | 381               | 372  | 66/360 (18.3%)            |     |     |     |     |

<sup>a</sup> Ion transporter families are based on Maathuis *et al.* (2003);

<sup>b</sup> Based on *S. parvula* genome annotation version 2.0

**Supplemental Table S5. List of DEGPs encoding ion transporters and channels**

| Ion transporter family                                    | Annotation                           | Sp homolog | At homolog | Root         |              |            | Shoot        |              |            | DEGP group |
|-----------------------------------------------------------|--------------------------------------|------------|------------|--------------|--------------|------------|--------------|--------------|------------|------------|
|                                                           |                                      |            |            | Mean Sp      | Mean At      | FDR (%)    | Mean Sp      | Mean At      | FDR (%)    |            |
| Ammonium transporter (AMTs)                               | AMT1;5                               | Sp3g22070  | At3g24290  | <b>8802</b>  | <b>47</b>    | <b>4.8</b> | 42           | 2            | 31.2       | SpR        |
| Anion exchanger<br>(BORs, HCO <sup>3-</sup> transporters) | BOR5                                 | Sp5g29940  | At1g74810  | <b>10582</b> | <b>26</b>    | <b>0.0</b> | <b>3841</b>  | <b>794</b>   | <b>0.3</b> | SpR, SpS   |
|                                                           | HCO <sup>3-</sup> transporter family | Sp5g01110  | At3g62270  | <b>351</b>   | <b>2072</b>  | <b>0.1</b> | 268          | 600          | 18.7       | AtR        |
|                                                           | PIP1;5                               | Sp7g21310  | At4g23400  | <b>839</b>   | <b>5902</b>  | <b>0.5</b> | 7046         | 11163        | 74.2       | AtR        |
|                                                           | PIP1A                                | Sp5g01970  | At3g61430  | 22635        | 37225        | 49.4       | <b>28705</b> | <b>8565</b>  | <b>1.8</b> | SpS        |
|                                                           | PIP2;5                               | Sp5g07610  | At3g54820  | <b>207</b>   | <b>1088</b>  | <b>0.2</b> | 465          | 580          | 87.7       | AtR        |
|                                                           | PIP2E                                | Sp4g21370  | At2g39010  | <b>812</b>   | <b>120</b>   | <b>0.1</b> | 10229        | 11519        | 97.5       | SpR        |
| Aquaporins (PIPs, TIPs, NIPs)                             | PIP3                                 | Sp7g32870  | At4g35100  | 22088        | 14938        | 67.5       | <b>47832</b> | <b>15656</b> | <b>3.1</b> | SpS        |
|                                                           | SIP1;2                               | Sp6g26010  | At5g18290  | <b>15</b>    | <b>140</b>   | <b>0.2</b> | 88           | 114          | 90.3       | AtR        |
|                                                           | TIP2;3                               | Sp2g12160  | At5g47450  | <b>28456</b> | <b>8171</b>  | <b>4.0</b> | 157          | 181          | 97.8       | SpR        |
|                                                           | NIP5;1                               | Sp6g07050  | At4g10380  | 4743         | 2917         | 53.5       | <b>6459</b>  | <b>985</b>   | <b>0.0</b> | SpS        |
|                                                           | TIP2;2                               | Sp7g16840  | At4g17340  | <b>1473</b>  | <b>21246</b> | <b>0.0</b> | <b>19</b>    | <b>4300</b>  | <b>0.0</b> | AtR, AtS   |
| Ca <sup>2+</sup> -H <sup>+</sup> antiporter (CAXs)        | CAX4                                 | Sp6g40770  | At5g01490  | <b>1583</b>  | <b>448</b>   | <b>2.9</b> | <b>49</b>    | <b>12</b>    | <b>2.8</b> | SpR, SpS   |
|                                                           | CHX24/25                             | Sp6g20150  | At5g37060  | <b>266</b>   | <b>0</b>     | <b>0.0</b> | <b>180</b>   | <b>0</b>     | <b>0.0</b> | SpR, SpS   |
| Cation-H <sup>+</sup> antiporter (CHXs)                   |                                      |            | At5g58460* |              | <b>3</b>     | <b>0.0</b> |              | <b>0</b>     | <b>0.0</b> |            |
|                                                           | CHX3                                 | Sp6g22500  | At5g22900  | <b>2732</b>  | <b>2</b>     | <b>0.0</b> | <b>949</b>   | <b>1</b>     | <b>0.0</b> | SpR, SpS   |
|                                                           | DND1                                 | Sp6g28680  | At5g15410  | <b>890</b>   | <b>250</b>   | <b>2.2</b> | 8285         | 5364         | 56.2       | SpR        |
| Cyclic nucleotide gated channel<br>(CNGCs)                | CNGC10/13                            | Sp6g01140  | At1g01340  | <b>1103</b>  | <b>6026</b>  | <b>1.1</b> | 791          | 409          | 50.7       | AtR        |
|                                                           |                                      |            | At4g01010* |              | 965          | 92.2       |              | 1239         | 70.0       |            |
|                                                           | CNGC9                                | Sp7g28440  | At4g30560  | <b>3018</b>  | <b>519</b>   | <b>0.1</b> | <b>3314</b>  | <b>437</b>   | <b>0.0</b> | SpR, SpS   |
|                                                           | GLR1.1                               | Sp3g03080  | At3g04110  | 61           | 390          | 7.7        | <b>95</b>    | <b>1397</b>  | <b>0.4</b> | AtS        |
|                                                           | GLR1.2/3/4                           | Sp2g18760  | At5g48400* |              | 138          | 75.4       |              | 214          | 93.2       |            |
|                                                           |                                      |            | At5g48410  | <b>50</b>    | 297          | 24.1       | <b>158</b>   | 161          | 98.8       | AtS        |
|                                                           |                                      |            | At3g07520  |              | <b>574</b>   | <b>0.0</b> |              | <b>778</b>   | <b>0.4</b> |            |
| Glutamate receptor (GLRs)                                 |                                      |            | At5g27100  |              | 1097         | 22.9       |              | <b>477</b>   | <b>0.0</b> |            |
|                                                           | GLR2.1/2/3/4                         | Sp4g03690  | At2g24720  | 478          | 1095         | 21.5       | <b>2</b>     | 17           | 10.2       | AtS        |
|                                                           |                                      |            | At2g24710  |              | 438          | 97.8       |              | 11           | 31.9       |            |
|                                                           |                                      |            | At4g31710  |              | 172          | 23.2       |              | 7            | 53.5       |            |
|                                                           | GLR3.3                               | Sp1g37300  | At1g42540  | 705          | 1109         | 59.8       | <b>742</b>   | <b>2265</b>  | <b>4.6</b> | AtS        |
|                                                           | GORK                                 | Sp7g04660  | At5g37500  | 2242         | 979          | 16.9       | <b>4882</b>  | <b>700</b>   | <b>0.0</b> | SpS        |
|                                                           | KCO1                                 | Sp6g17550  | At5g55630  | 618          | 949          | 60.4       | <b>302</b>   | <b>1405</b>  | <b>0.4</b> | AtS        |
| K <sup>+</sup> channel<br>(AKT1, KCOs, SKOR, GORK, KT)    | KAT3                                 | Sp7g30420  | At4g32650  | 2582         | 2816         | 94.8       | <b>57</b>    | <b>505</b>   | <b>0.0</b> | AtS        |
|                                                           | KCO2                                 | Sp2g11210  | At5g46370  | <b>422</b>   | <b>52</b>    | <b>0.1</b> | <b>141</b>   | <b>7</b>     | <b>0.0</b> | SpR, SpS   |
|                                                           | KT5                                  | Sp7g30270  | At4g32500  | <b>92</b>    | <b>7</b>     | <b>0.2</b> | <b>214</b>   | <b>3</b>     | <b>0.0</b> | SpR, SpS   |
|                                                           | SKOR                                 | Sp3g01880  | At3g02850  | <b>272</b>   | <b>2188</b>  | <b>0.0</b> | 29           | 94           | 5.7        | AtR        |
|                                                           | KEA1                                 | Sp1g00490  | At1g01790  | <b>6867</b>  | <b>965</b>   | <b>0.0</b> | 10601        | 12926        | 90.2       | SpR        |
| K <sup>+</sup> -efflux system (KEAs)                      |                                      | Sp1g00500* |            | 2212         |              | 21.7       | 13075        |              | 99.2       |            |
|                                                           | KEA5                                 | Sp2g02290  | At5g51710  | <b>1983</b>  | <b>547</b>   | <b>2.2</b> | 1494         | 989          | 65.1       | SpR        |
| K <sup>+</sup> -transporter (KUPs, TRH1)                  | KUP9                                 | Sp7g12130  | At4g19960  | 1901         | <b>941</b>   | 57.6       | 4830         | 3181         | 84.9       | SpR        |
|                                                           |                                      | Sp7g18400* |            | <b>4540</b>  |              | <b>0.8</b> | 2636         |              | 85.9       |            |



Supplemental Table S5. continued

| Ion transporter family                                     | Annotation               | Sp homolog | At homolog  | Root        |             |             | Shoot       |             |             | DEGP group |             |             |            |              |             |            |          |
|------------------------------------------------------------|--------------------------|------------|-------------|-------------|-------------|-------------|-------------|-------------|-------------|------------|-------------|-------------|------------|--------------|-------------|------------|----------|
|                                                            |                          |            |             | Mean Sp     | Mean At     | FDR (%)     | Mean Sp     | Mean At     | FDR (%)     |            |             |             |            |              |             |            |          |
| Metal transporter<br>(NRAMPs, ZIPs, MTPBs)                 | Cation efflux family     | Sp5g04660  | At3g58060   | <b>434</b>  | <b>21</b>   | <b>0.0</b>  | <b>4</b>    | <b>30</b>   | <b>0.8</b>  | SpR, AtS   |             |             |            |              |             |            |          |
|                                                            | emb1513                  | Sp4g20220  | At2g37920   | <b>343</b>  | <b>106</b>  | <b>4.1</b>  | 1606        | 1533        | 97.7        | SpR        |             |             |            |              |             |            |          |
|                                                            | MTPB1                    | Sp4g12170  | At2g29410   | <b>304</b>  | <b>69</b>   | <b>2.8</b>  | 178         | 54          | 9.8         | SpR        |             |             |            |              |             |            |          |
|                                                            | NRAMP1                   | Sp5g34930  | At1g80830   | <b>494</b>  | <b>7179</b> | <b>0.0</b>  | <b>680</b>  | <b>2465</b> | <b>1.4</b>  | AtR, AtS   |             |             |            |              |             |            |          |
|                                                            | NRAMP5                   | Sp7g17490  | At4g18790   | <b>255</b>  | <b>1</b>    | <b>0.0</b>  | <b>119</b>  | <b>1</b>    | <b>0.0</b>  | SpR, SpS   |             |             |            |              |             |            |          |
|                                                            | NRAMP6                   | Sp1g14270  | At1g15960   | <b>444</b>  | <b>2056</b> | <b>0.3</b>  | <b>401</b>  | <b>2300</b> | <b>0.1</b>  | AtR, AtS   |             |             |            |              |             |            |          |
|                                                            | ZIP2                     | Sp6g21230  | At5g59520   | <b>63</b>   | <b>468</b>  | <b>0.2</b>  | <b>0</b>    | <b>12</b>   | <b>0.5</b>  | AtR, AtS   |             |             |            |              |             |            |          |
|                                                            | ZIP5                     | Sp1g04160  | At1g05300   | <b>57</b>   | <b>927</b>  | <b>0.1</b>  | 1255        | 1512        | 93.2        | AtR        |             |             |            |              |             |            |          |
| ZIP6                                                       | Sp4g12640                | At2g30080  | <b>1664</b> | <b>468</b>  | <b>2.6</b>  | 124         | 186         | 67.2        | AtR         |            |             |             |            |              |             |            |          |
| Mg <sup>2+</sup> -transporter<br>(MGTs, MRSs)              | MGT7                     | Sp6g33680  | At5g09690   | 674         | 833         | 87.2        | <b>15</b>   | <b>295</b>  | <b>0.0</b>  | AtS        |             |             |            |              |             |            |          |
| Na <sup>+</sup> K <sup>+</sup> transporter (HKT1)          | HKT1                     | Sp6g07110  | At4g10310   | <b>16</b>   | <b>1627</b> | <b>0.0</b>  | <b>1078</b> | <b>92</b>   | <b>0.5</b>  | SpS, AtR   |             |             |            |              |             |            |          |
|                                                            |                          | Sp6g07120* |             | <b>14</b>   |             |             | <b>3</b>    |             |             |            | <b>0.4</b>  |             |            |              |             |            |          |
| Na <sup>+</sup> -H <sup>+</sup> antiporter<br>(NHXs, SOS1) | NHX8                     | Sp1g13020  | At1g14660   | 1110        | <b>506</b>  | 51.4        | <b>5124</b> | <b>660</b>  | 85.8        | SpR, SpS   |             |             |            |              |             |            |          |
|                                                            |                          | Sp1g13030* |             | 1247        |             |             | 438         |             |             |            | 74.2        |             |            |              |             |            |          |
|                                                            |                          | Sp1g13040  |             | <b>3733</b> |             |             | 484         |             |             |            |             |             |            |              |             |            |          |
|                                                            |                          | SOS1       |             | Sp2g13410   |             |             | At2g01980   |             |             |            | <b>8356</b> | <b>1828</b> | <b>0.3</b> | <b>11039</b> | <b>1628</b> | <b>0.0</b> | SpR, SpS |
|                                                            |                          | NHX3       |             | Sp6g17350   |             |             | At5g55470   |             |             |            | 64          | 153         | 32.8       | <b>7</b>     | <b>305</b>  | <b>0.0</b> | AtS      |
| Nitrate transporter (NRTs)                                 | NRT2.6                   | Sp5g16190  | At3g45060   | <b>4</b>    | <b>838</b>  | <b>0.0</b>  | <b>0</b>    | <b>226</b>  | <b>0.0</b>  | AtR, AtS   |             |             |            |              |             |            |          |
|                                                            |                          | Sp5g16200* |             | 196         |             |             | <b>6</b>    |             |             |            | <b>0.1</b>  |             |            |              |             |            |          |
| NRT3.1                                                     | Sp6g12300                | At5g50200  | 9607        | 8439        | 92.9        | <b>117</b>  | <b>890</b>  | <b>0.1</b>  | AtS         |            |             |             |            |              |             |            |          |
| Other anion transporter<br>(DiT2.2, DUR3, TDT)             | DiT2.2                   | Sp2g27340  | At5g64280   | <b>169</b>  | <b>1102</b> | <b>0.0</b>  | 2144        | 3619        | 51.8        | AtR        |             |             |            |              |             |            |          |
|                                                            |                          | DUR3       | Sp1g01330   | At1g02260   | 396         | 1120        | 7.4         | <b>418</b>  | <b>1569</b> | <b>1.6</b> | AtS         |             |            |              |             |            |          |
|                                                            |                          | TDT        | Sp2g12290   | At5g47560   | <b>63</b>   | <b>790</b>  | <b>0.0</b>  | 4704        | 2955        | 58.2       | AtR         |             |            |              |             |            |          |
| Phosphate transporter<br>(PHTs)                            | PHT1;3/5/6/7             | Sp5g07750  | At5g43360   | <b>0</b>    | 100.0       | <b>1475</b> | <b>0</b>    | 31          | 31.3        | AtR        |             |             |            |              |             |            |          |
|                                                            |                          |            | At2g32830   |             |             | 14          |             | 189         | 18.3        |            |             |             |            |              |             |            |          |
|                                                            |                          |            | At5g43340   |             |             | 0           |             | 5           | 84.6        |            |             |             |            |              |             |            |          |
|                                                            |                          |            | At3g54700*  |             |             | 1           |             | 14          | 60.0        |            |             |             |            |              |             |            |          |
| P-type pump<br>(ACAs, AHAs, HMAs, ECAs)                    | AHA10                    | Sp1g15390  | At1g17260   | <b>18</b>   | <b>159</b>  | <b>0.2</b>  | 49          | 165         | 13.6        | AtR        |             |             |            |              |             |            |          |
|                                                            | E1-E2 type ATPase family | Sp1g40710  | At1g54280   | 185         | 61          | 14.7        | <b>181</b>  | <b>17</b>   | <b>0.1</b>  | SpS        |             |             |            |              |             |            |          |
|                                                            |                          | HA8        | Sp5g18280   | At3g42640   | <b>0</b>    | <b>1322</b> | <b>0.0</b>  | <b>0</b>    | <b>752</b>  | <b>0.0</b> | AtR, AtS    |             |            |              |             |            |          |
|                                                            | HMA2                     | Sp7g27960  | At4g30110   | 1700        | 1355        | 85.1        | <b>447</b>  | <b>1670</b> | <b>1.6</b>  | AtS        |             |             |            |              |             |            |          |
|                                                            | HMA3                     | Sp7g27970  | At4g30120   | <b>11</b>   | <b>225</b>  | <b>0.0</b>  | <b>8</b>    | <b>76</b>   | <b>0.5</b>  | AtR, AtS   |             |             |            |              |             |            |          |
|                                                            | HMA5                     | Sp2g01170* | At1g63440   | <b>805</b>  | <b>3524</b> | <b>0.6</b>  | 237         | 326         | 72.4        | AtR        |             |             |            |              |             |            |          |
| Sp7g11650                                                  | <b>340</b>               | <b>0.0</b> |             | 482         |             |             | 71.7        |             |             |            |             |             |            |              |             |            |          |
| Sulphate transporter<br>(SULTRs)                           | AST91                    | Sp1g20530  | At1g23090   | <b>1817</b> | <b>81</b>   | <b>0.0</b>  | 4620        | 2054        | 19.5        | SpR        |             |             |            |              |             |            |          |
|                                                            | SULTR1;1                 | Sp6g09230  | At4g08620   | <b>0</b>    | <b>581</b>  | <b>0.0</b>  | 4           | 20          | 47.4        | AtR        |             |             |            |              |             |            |          |
|                                                            | SULTR3;2                 | Sp5g10370  | At4g02700   | <b>497</b>  | <b>131</b>  | <b>1.6</b>  | <b>4178</b> | <b>130</b>  | <b>0.0</b>  | SpR, SpS   |             |             |            |              |             |            |          |
|                                                            | SULTR3;5                 | Sp6g24790  | At5g19600   | 1007        | 2201        | 60.0        | <b>2042</b> | <b>252</b>  | <b>3.5</b>  | SpS        |             |             |            |              |             |            |          |
|                                                            | SULTR4;2                 | Sp3g10650  | At3g12520   | <b>3929</b> | <b>311</b>  | <b>0.0</b>  | <b>3617</b> | <b>884</b>  | <b>0.6</b>  | SpR, SpS   |             |             |            |              |             |            |          |

**Supplemental Table S6.** Detailed information of homologous gene pairs shown in Figure 4

| Figure | ID                  | Homologous gene pairs                               | Annotation                                           | BLASTN best match | SV event | promoter sequence identity (%) | Root           |                |         | Shoot          |                |         |
|--------|---------------------|-----------------------------------------------------|------------------------------------------------------|-------------------|----------|--------------------------------|----------------|----------------|---------|----------------|----------------|---------|
|        |                     |                                                     |                                                      |                   |          |                                | Mean <i>Sp</i> | Mean <i>At</i> | FDR (%) | Mean <i>Sp</i> | Mean <i>At</i> | FDR (%) |
| Fig4A  | 1                   | Sp1g00420-At1g01880                                 | 5'-3' exonuclease family                             | reciprocal        |          | 43.7                           | 104            | 109            | 97.1    | 162            | 374            | 30.2    |
|        | 2                   | Sp1g00430-At1g01860                                 | PALEFACE 1 (PFC1)                                    | reciprocal        |          | 62.1                           | 278            | 402            | 69.0    | 782            | 1,266          | 56.3    |
|        | 3                   | Sp1g00440-At1g01840                                 | unknown protein                                      | reciprocal        |          | 50.0                           | 65             | 109            | 66.2    | 180            | 108            | 67.2    |
|        | 4                   | Sp1g00450-At1g01830                                 | ARM repeat superfamily                               | reciprocal        |          | 58.1                           | 1,027          | 919            | 92.4    | 1,147          | 982            | 92.7    |
|        | 5                   | Sp1g00460-At1g01820                                 | peroxin 11c (PEX11C)                                 | reciprocal        |          | 34.8                           | 6,353          | 4,018          | 60.8    | 3,874          | 2,642          | 65.8    |
|        | 6                   | Sp1g00470-At1g01810                                 | unknown protein                                      | reciprocal        |          | 58.1                           | 51             | 46             | 99.6    | 31             | 52             | 78.4    |
|        | 7                   | Sp1g00480-At1g01800                                 | NAD(P)-binding Rossmann-fold superfamily             | reciprocal        |          | 10.3                           | 2,345          | 2,554          | 95.8    | 3,248          | 3,775          | 90.8    |
|        | KEA1                | Sp1g00490-At1g01790                                 | K <sup>+</sup> efflux antiporter 1 (KEA1)            | Sp->At            | TD (Sp)  | 15.3                           | 965            | 6,867          | 0.0     | 12,926         | 10,601         | 90.2    |
|        |                     | Sp1g00500-At1g01790                                 |                                                      | reciprocal        |          | 67.1                           |                |                |         |                |                |         |
|        | 8                   | Sp1g00510-At1g01780                                 | GATA type zinc finger transcription factor family    | reciprocal        |          | 80.9                           | 951            | 58             | 0.0     | 625            | 18             | 0.0     |
|        | 9                   | Sp1g00540-At1g01760                                 | adenosine deaminases                                 | reciprocal        |          | 70.0                           | 287            | 535            | 42.4    | 210            | 446            | 31.3    |
|        | 10                  | Sp1g00550-At1g01750                                 | actin depolymerizing factor 11 (ADF11)               | reciprocal        |          | 45.1                           | 603            | 770            | 85.4    | 99             | 121            | 88.1    |
| 11     | Sp1g00560-At1g01740 | Protein kinase with tetratricopeptide repeat domain | reciprocal                                           |                   | 53.3     | 572                            | 1,035          | 37.8           | 616     | 915            | 70.0           |         |
| 12     | Sp1g00570-At1g01730 | unknown protein                                     | reciprocal                                           |                   | 57.7     | 1,529                          | 1,234          | 85.3           | 1,113   | 802            | 73.7           |         |
| Fig4B  | 1                   | Sp1g12980-At1g14620                                 | DECOY (DECOY)                                        | reciprocal        |          | 25.1                           | 1,998          | 1,198          | 49.2    | 890            | 807            | 96.3    |
|        | 2                   | Sp1g12990-At1g14630                                 | unknown protein                                      | reciprocal        |          | 68.1                           | 295            | 1,037          | 17.9    | 114            | 290            | 33.3    |
|        | 3                   | Sp1g13010-At1g14640                                 | SWAP (Suppressor-of-White-APricot) domain            | At->Sp            | TD (At)  | 0.0                            | 1,095          | 5,571          | 0.1     | 458            | 4,050          | 0.0     |
|        |                     | Sp1g13010-At1g14650                                 |                                                      | reciprocal        |          | 39.6                           |                |                |         |                |                |         |
|        | NHX8                | Sp1g13020-At1g14660                                 | Na <sup>+</sup> /H <sup>+</sup> exchanger 8 (NHX8)   | Sp->At            | TD (Sp)  | 0.0                            | 506            | 1,247          | 51.4    | 660            | 438            | 85.8    |
|        |                     | Sp1g13030-At1g14660                                 |                                                      | reciprocal        |          | 8.4                            |                |                |         |                |                |         |
|        | 4                   | Sp1g13040-At1g14660                                 |                                                      | Sp->At            |          | 0.0                            |                |                |         |                |                |         |
| 4      | Sp1g13050-At1g14670 | Endomembrane protein 70 protein family              | reciprocal                                           |                   | 15.8     | 7,185                          | 5,865          | 81.0           | 6,715   | 4,386          | 64.2           |         |
| 5      | Sp1g13060-At1g14680 | unknown protein                                     | reciprocal                                           |                   | 76.3     | 56                             | 28             | 64.3           | 68      | 12             | 10.1           |         |
| 6      | Sp1g13070-At1g14685 | basic pentacysteine 2 (BPC2)                        | reciprocal                                           |                   | 70.2     | 1,755                          | 1,831          | 99.2           | 2,089   | 2,624          | 83.6           |         |
| 7      | Sp1g13080-At1g14686 | ENTH/ANTH/VHS superfamily                           | reciprocal                                           |                   | 41.7     | 5                              | 10             | 87.3           | 3       | 8              | 84.9           |         |
| Fig4C  | 1                   | Sp6g07060-At4g10360                                 | TRAM/LAG1/CLN8 (TLC) lipid-sensing domain            | reciprocal        |          | 54.9                           | 1,565          | 769            | 31.2    | 1,548          | 1,149          | 77.3    |
|        | 2                   | Sp6g07070-At4g10350                                 | NAC domain containing 70 (NAC070)                    | reciprocal        |          | 68.3                           | 124            | 195            | 82.8    | 2              | 0              | 84.2    |
|        | 3                   | Sp6g07090-At4g10340                                 | light harvesting complex of photosystem II 5 (LHCB5) | reciprocal        |          | 67.9                           | 1,364          | 1,277          | 100.0   | 218,344        | 160,405        | 95.6    |
|        | 4                   | Sp6g07100-At4g10330                                 | glycine-rich protein                                 | reciprocal        |          | 9.6                            | 529            | 329            | 61.8    | 481            | 445            | 97.9    |
|        | -                   | Sp7g00280-At4g10320                                 | tRNA synthetase class I (I, L, M and V) family       | reciprocal        | Tlc      | 0.0                            | 8,168          | 8,841          | 96.3    | 7,131          | 6,355          | 94.7    |
|        | HKT1                | Sp6g07110-At4g10310                                 | high-affinity K <sup>+</sup> transporter 1 (HKT1)    | Sp->At            | TD (Sp)  | 13.2                           | 1,627          | 16             | 0.0     | 92             | 1,078          | 0.5     |
|        |                     | Sp6g07120-At4g10310                                 |                                                      | reciprocal        |          | 0.0                            |                |                |         |                |                |         |
| CBL10  | Sp6g07129-At4g33000 | calcineurin B-like 10 (CBL10)                       | Sp->At                                               | Tlc-TD (Sp)       | 0.0      | 117                            | 64             | 58.6           | 1,520   | 1,139          | 88.2           |         |
|        | Sp6g07131-At4g33000 |                                                     | Sp->At                                               |                   | 0.0      |                                |                |                |         |                |                | 119     |
| 5      | Sp6g07140-At4g10300 | RmlC-like cupins superfamily                        | reciprocal                                           |                   | 4.1      | 276                            | 402            | 72.2           | 5,261   | 4,899          | 99.3           |         |

Homologous gene pairs highlighted in Figure 4 are shaded gray.

**Supplemental Table S7.** Detailed information of homologous gene pairs shown in Figure 5

| Figure                  | ID                  | Homologous gene pairs                       | Annotation                                               | BLASTN best match | SV event | promoter sequence identity (%) | Root           |                |            | Shoot          |                |            |
|-------------------------|---------------------|---------------------------------------------|----------------------------------------------------------|-------------------|----------|--------------------------------|----------------|----------------|------------|----------------|----------------|------------|
|                         |                     |                                             |                                                          |                   |          |                                | Mean <i>Sp</i> | Mean <i>At</i> | FDR (%)    | Mean <i>Sp</i> | Mean <i>At</i> | FDR (%)    |
| Fig5A<br>upper<br>panel | 1                   | Sp5g35290-At1g80510                         | Transmembrane amino acid transporter family              | reciprocal        |          | 64.6                           | 589            | 1,279          | 26.9       | 986            | 1,106          | 95.1       |
|                         | 2                   | Sp5g35300-At1g80500*                        | SNARE-like superfamily protein                           | reciprocal        |          | -                              | -              | -              | -          | -              | -              | -          |
|                         | 3                   | Sp5g35310-At1g80490                         | TOPLESS-related 1 (TPR1)                                 | reciprocal        |          | 71.0                           | 6,798          | 10,764         | 54.4       | 3,870          | 6,278          | 54.3       |
|                         | 4                   | Sp5g35320-At1g80480                         | plastid transcriptionally active 17 (PTAC17)             | reciprocal        |          | 62.3                           | 1,178          | 1,824          | 57.9       | 6,494          | 6,278          | 100.0      |
|                         | -                   | Sp5g35330-At4g33370                         | DEA(D/H)-box RNA helicase family                         | At->Sp            | Tlc      | 0.0                            | <b>30</b>      | <b>2,197</b>   | <b>0.0</b> | <b>38</b>      | <b>1,530</b>   | <b>0.0</b> |
|                         | -                   | Sp5g35340-At2g26865                         | LOCATED IN: endomembrane system                          | reciprocal        | Tlc      | 53.5                           | 0              | 0              | 100.0      | 0              | 0              | 100.0      |
|                         | AVP1                | Sp5g35350-At1g15690                         | ( <i>SpAVP1;2</i> )                                      | Sp->At            | Tlc      | 0.0                            | <b>21,806</b>  | <b>6,264</b>   | <b>1.7</b> | <b>43,620</b>  | <b>3,510</b>   | <b>0.0</b> |
|                         | 5                   | Sp5g35360-At1g80460                         | nonhost resistance to <i>P. s. phaseolicola</i> 1 (NHO1) | reciprocal        |          | 40.3                           | 5,578          | 2,284          | 13.3       | 3,154          | 1,943          | 55.1       |
|                         | 6                   | Sp5g35370-At1g80450                         | VQ motif-containing                                      | reciprocal        |          | 65.6                           | 291            | 200            | 72.2       | 305            | 191            | 60.8       |
| 7                       | Sp5g35380-At1g80440 | Galactose oxidase/kelch repeat superfamily  | reciprocal                                               |                   | 40.4     | 1,271                          | 861            | 76.9           | 3,107      | 3,966          | 88.7           |            |
| 8                       | Sp5g35390-At1g80420 | ATXRCC1                                     | reciprocal                                               |                   | 59.1     | 901                            | 919            | 100.0          | 1,274      | 813            | 60.2           |            |
| 9                       | Sp5g35400-At1g80410 | EMBRYO DEFECTIVE 2753 (EMB2753)             | reciprocal                                               |                   | 73.9     | 8,935                          | 7,898          | 92.4           | 6,243      | 6,053          | 99.8           |            |
| Fig5A<br>lower<br>panel | 10                  | Sp1g13970-At1g15660                         | centromere protein C (CENP-C)                            | reciprocal        |          | 17.9                           | 872            | 1,280          | 70.2       | 810            | 610            | 82.2       |
|                         | 11                  | Sp1g13980-At1g15670                         | Galactose oxidase/kelch repeat superfamily               | reciprocal        |          | 37.8                           | 4,083          | 2,766          | 87.0       | 1,002          | 348            | 54.3       |
|                         | AVP1                | Sp1g13990-At1g15690                         | AVP1 ( <i>SpAVP1;1</i> )                                 | reciprocal        |          | 52.5                           | 21,806         | 30,195         | 73.9       | 43,620         | 59,813         | 72.8       |
|                         | 12                  | Sp1g14000-At1g15700                         | ATPC2                                                    | reciprocal        |          | 58.2                           | 608            | 625            | 98.9       | 263            | 520            | 37.0       |
|                         | 13                  | Sp1g14010-At1g15710                         | prephenate dehydrogenase family                          | reciprocal        |          | 55.5                           | 555            | 441            | 82.5       | 847            | 944            | 93.6       |
|                         | 14                  | Sp1g14020-At1g15730                         | Cobalamin biosynthesis CobW-like                         | reciprocal        |          | 22.8                           | 589            | 489            | 94.8       | 2,340          | 1,323          | 45.8       |
|                         | 15                  | Sp1g14030-At1g15740                         | Leucine-rich repeat family                               | reciprocal        |          | 70.4                           | 5,147          | 3,745          | 73.7       | 6,184          | 6,037          | 100.0      |
| 16                      | Sp1g14040-At1g15750 | TOPLESS (TPL)                               | reciprocal                                               |                   | 83.1     | 10,725                         | 8,159          | 77.7           | 8,527      | 6,083          | 71.8           |            |
| Fig5B                   | 1                   | Sp5g29900-At1g74790                         | catalytics                                               | reciprocal        |          | 78.3                           | 1,398          | 3,338          | 17.6       | 905            | 1,927          | 23.2       |
|                         | -                   | Sp5g29910-At1g18950                         | DDT domain superfamily                                   | Sp->At            | Tlc      | 14.7                           | 2,404          | 981            | 15.1       | 2,172          | 868            | 12.3       |
|                         | 2                   | Sp5g29920-At1g74800                         | Galactosyltransferase family                             | reciprocal        |          | 17.7                           | 796            | 1,209          | 65.4       | 833            | 957            | 92.1       |
|                         | -                   | Sp5g29930-At5g14200*                        | isopropylmalate dehydrogenase 1 (IMD1)                   | Sp->At            | Tlc      | -                              | -              | -              | -          | -              | -              | -          |
|                         | BOR5                | Sp5g29940-At1g74810                         | BOR5                                                     | reciprocal        |          | 8.6                            | <b>26</b>      | <b>10,582</b>  | <b>0.0</b> | <b>794</b>     | <b>3,841</b>   | <b>0.3</b> |
|                         | 3                   | Sp5g29950-At1g74820                         | RmlC-like cupins superfamily                             | reciprocal        |          | 58.8                           | 1              | 1              | 100.0      | 0              | 0              | 100.0      |
| 4                       | Sp5g29960-At1g74830 | Protein of unknown protein function, DUF593 | reciprocal                                               |                   | 81.2     | 140                            | 21             | 52.9           | 5          | 0              | 34.7           |            |
| 5                       | Sp5g29970-At1g74840 | Homeodomain-like superfamily                | reciprocal                                               |                   | 37.7     | 9,335                          | 4,212          | 18.9           | 2,375      | 2,291          | 100.0          |            |
| 6                       | Sp5g29980-At1g74850 | plastid transcriptionally active 2 (PTAC2)  | reciprocal                                               |                   | 32.9     | 248                            | 592            | 16.6           | 3,202      | 3,236          | 100.0          |            |

Homologous gene pairs highlighted in Figure 5 are shaded gray; \* partial homology

## References used in the supporting information

- An, R., et al. (2007). AtNHX8, a member of the monovalent cation: proton antiporter-1 family in *Arabidopsis thaliana*, encodes a putative Li<sup>+</sup>/H<sup>+</sup> antiporter. *Plant J*, 49(4), 718–728.
- Anders, S., & Huber, W. (2010). Differential expression analysis for sequence count data. *Genome Biol*, 11(10).
- Grant, G. R. et al. (2011). Comparative analysis of RNA-Seq alignment algorithms and the RNA-Seq unified mapper (RUM). *Bioinformatics*, 27(18), 2518–2528.
- Li, L., Stoeckert, C. J., & Roos, D. S. (2003). OrthoMCL: identification of ortholog groups for eukaryotic genomes. *Genome Res*, 13(9), 2178–2189.
- Lyons, E. and Freeling, M. (2008). How to usefully compare homologous plant genes and chromosomes as DNA sequences. *Plant J*, 53(4), 661–673.
- Pasapula, V., et al. (2011). Expression of an Arabidopsis vacuolar H<sup>+</sup>-pyrophosphatase gene (*AVP1*) in cotton improves drought- and salt tolerance and increases fibre yield in the field conditions. *Plant Biotech J*, 9(1), 88–99.
- Yang, R., et al. (2013). The reference genome of the halophytic plant *Eutrema salsugineum*. *Front Plant Sci*, 4, 46.
- Yi, X., Du, Z., & Su, Z. (2013). PlantGSEA: a gene set enrichment analysis toolkit for plant community. *Nucleic Acids Res*, 41, W98–W103.
